# Supplementary material for: One-Pot Tandem Alcoholysis-Hydrogenation of Polylactic Acid to 1,2-Propanediol
Source: MDPI journal article supplement (doi:10.3390/polym15020413), 2023-01-12
Supplement: s1 [file s1]

Supplementary Information For

# One-Pot Tandem Alcoholysis-Hydrogenation of Polylactic Acid to 1,2-Propanediol

Jialin Xu <sup>1,2</sup>, Kuo Zhou <sup>3</sup>, Linlin Qin <sup>1</sup>, Zaiming Tan <sup>1</sup>, Shijing Huang <sup>1</sup>, Peigao Duan <sup>2</sup> and Shimin Kang <sup>1,\*</sup>

<sup>1</sup> Engineering Research Center of None-Food Biomass Efficient Pyrolysis and Utilization Technology of Guangdong Higher Education Institutes, Guangdong Provincial Key Laboratory of Distributed Energy Systems, Dongguan University of Technology, Dongguan 523808, China

<sup>2</sup> School of Chemical Engineering and Technology, Xi'an Jiaotong University, Xi'an 710049, China

<sup>3</sup> Department of Chemistry, Lishui University, Lishui 323000, China

\* Correspondence: kangshimin@dgut.edu.cn

## Contents

### 1. Figures

1.1 **Figure S1.** GC-MS analysis of methanolization and hydrogenation products from PLA powder and methyl lactate.

1.2 **Figure S2.** GC-MS analysis of controlled experiments.

1.3 **Figure S3.** Validation of fitted model.

1.4 **Figure S4.** FTIR spectra of PLA and its residues.

1.5 **Figure S5.** GC-MS analysis of different PLA products-derived degradation liquids.

### 2. Tables

2.1 **Table S1.** Bio-based processes examples towards 1,2-PDO production.

2.2 **Table S2.** Experimental design and observed response.

2.3 **Table S3.** ANOVA results of the quadratic model.

### 3. Reference

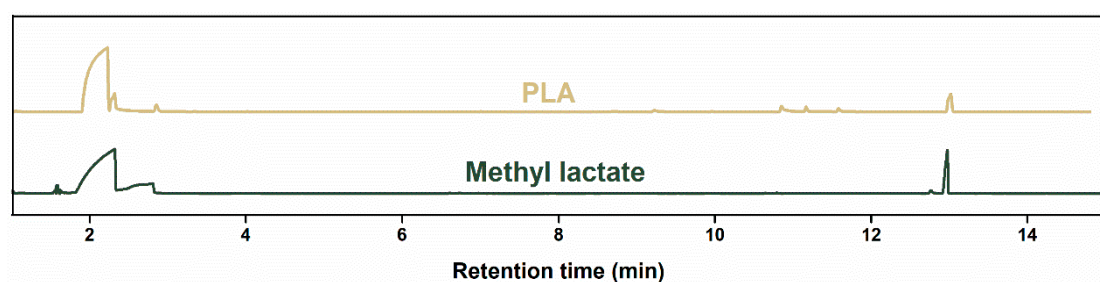

**Figure S1.** GC-MS analysis of methanolization and hydrogenation products from PLA powder and methyl lactate.

Reaction conditions: 1 g feedstock, 10 mL methanol, 3.0 MPa H<sub>2</sub>, 0.1 g Raney Co, reacting for 12 h.

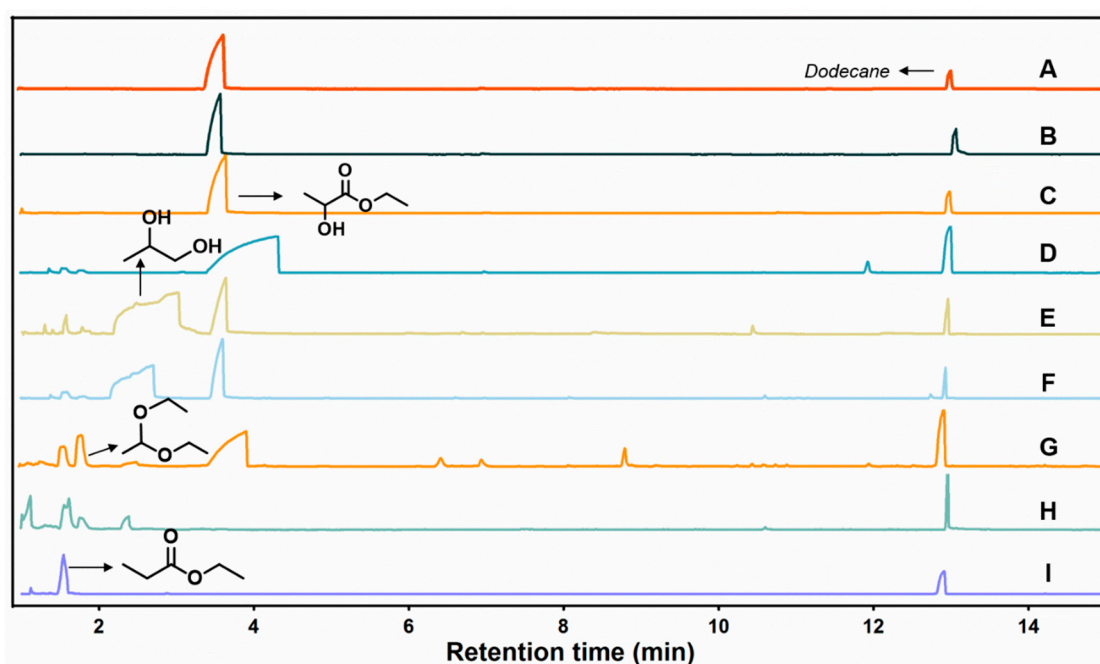

**Figure S2.** GC-MS analysis of control experiments. (A) 1 g PLA powder, 10 mL ethanol, 0.3 MPa N<sub>2</sub>, 180 °C, (B) 1 g PLA powder, 10 mL ethanol, 3 MPa H<sub>2</sub>, 180 °C, (C) 1 g PLA powder, 10 mL ethanol, 0.3 MPa N<sub>2</sub>, 0.1 g Raney Co, 180 °C, (D) 1 g lactide, 10 mL ethanol, 0.3 MPa N<sub>2</sub>, 180 °C, (E) 1 g lactide, 10 mL ethanol, 3 MPa H<sub>2</sub>, Raney Co, 180 °C, (F) 1 g ethyl lactate, 10 mL ethanol, 3 MPa H<sub>2</sub>, Raney Co, 180 °C, (G) 1 g ethyl lactate, 10 mL ethanol, 3 MPa H<sub>2</sub>, Raney Co, 240 °C, (H) 1 g 1,2-propanediol, 10 mL ethanol, 3 MPa H<sub>2</sub>, Raney Co, 240 °C, (I) 1 g ethyl propionate, 10 mL ethanol, 3 MPa H<sub>2</sub>, Raney Co, 240 °C.

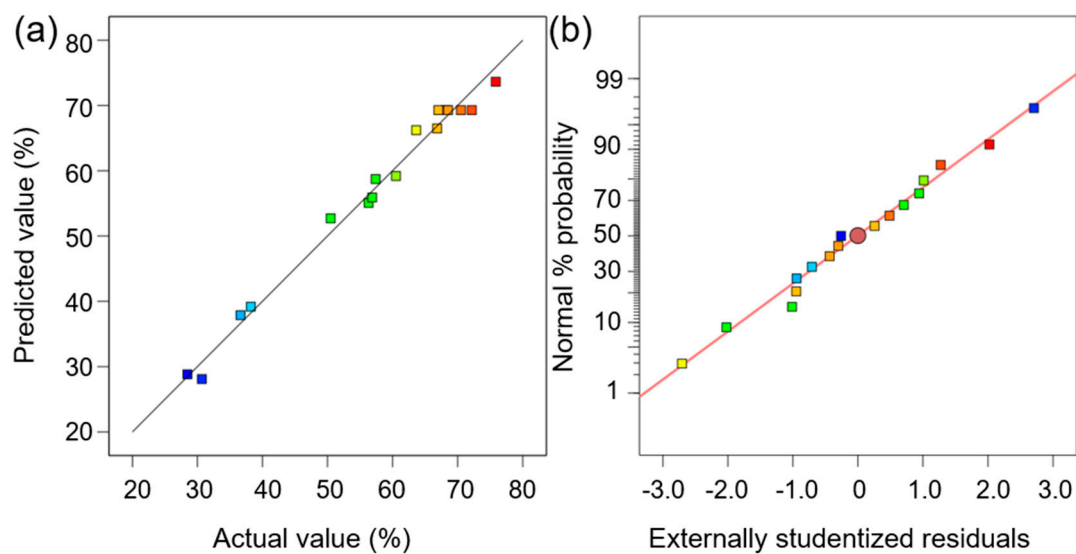

**Figure S3.** Validation of fitted model. (a) Comparative plot between actual and predicted values; (b) normal plot of residuals between normal % probability versus studentized residuals.

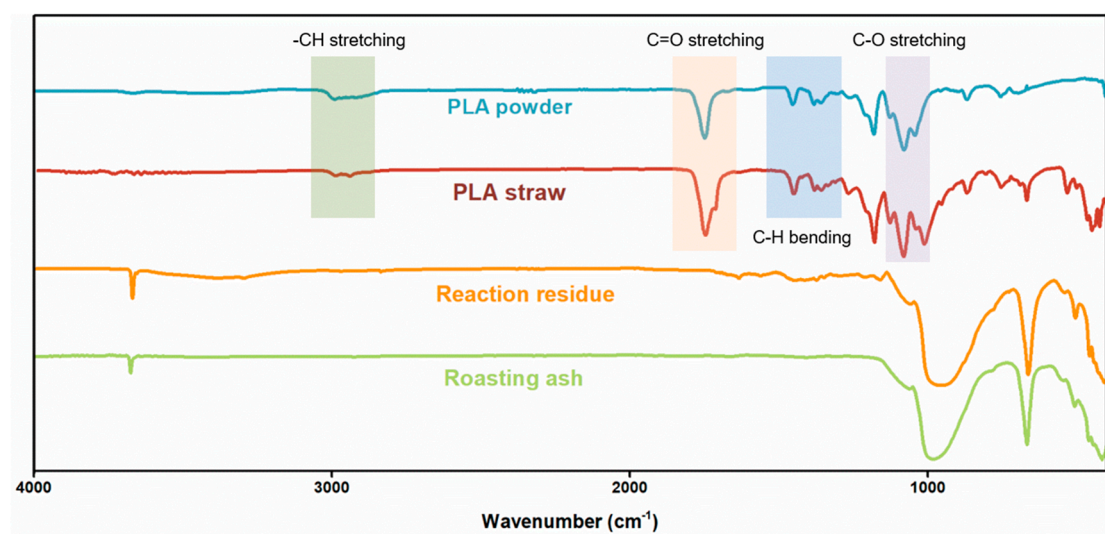

**Figure S4.** FTIR spectra of PLA and its residues. Residues formation conditions: 1 g PLA straws, 3 MPa H<sub>2</sub>, 0.1 g Raney Co, 27 mL ethanol, 187 °C, and reacting for 15.6 h.

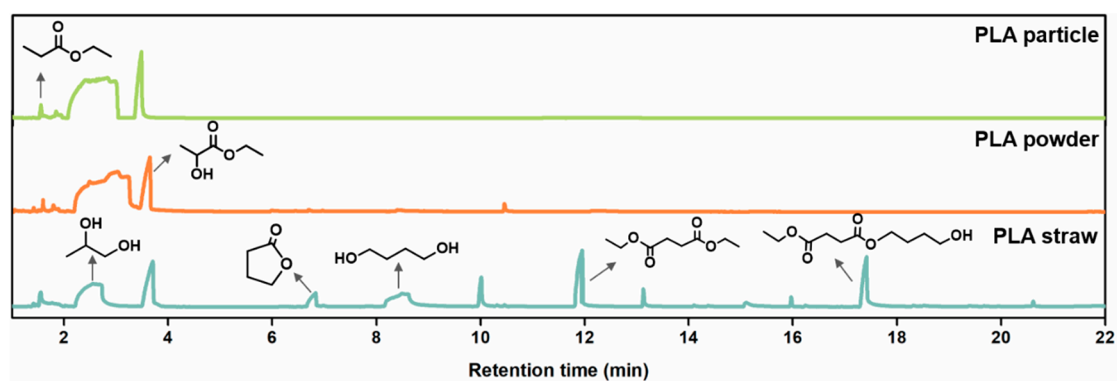

**Figure S5.** GC-MS analysis of different PLA products-derived degradation liquids. Reaction conditions: 1 g feedstock, 3 MPa H<sub>2</sub>, 0.1 g Raney Co, 27 mL ethanol, 187 °C, and reacting for 15.6 h.

**Table S1.** Bio-based processes examples towards 1,2-PDO production.

| Feedstock     | Solvent          | Catalyst                                       | Reaction conditions |                          |        |       | Conversion (%) | Selectivity (%) | Reference |
|---------------|------------------|------------------------------------------------|---------------------|--------------------------|--------|-------|----------------|-----------------|-----------|
|               |                  |                                                | Temp. (°C)          | H <sub>2</sub> (Bar)     | Press. | T (h) |                |                 |           |
| Glycerol      | H <sub>2</sub> O | Cu/MgO                                         | 210                 | 45                       |        | 12    | 96             | 93              | [1]       |
| Glycerol      | -                | Pd-CuCr                                        | 220                 | 60                       |        | 12    | 83             | 93              | [2]       |
| Glycerol      | EtOH             | Rh-Cu                                          | 180                 | 20                       |        | 10    | 91             | 99              | [3]       |
| Glycerol      | H <sub>2</sub> O | Cu/Mg/Al                                       | 180                 | 30                       |        | 20    | 91             | 96              | [4]       |
| Glycerol      | H <sub>2</sub> O | CuPd/TiO <sub>2</sub> -Na                      | 220                 | 7                        |        | 6     | 65             | 85              | [5]       |
| Cellulose     | H <sub>2</sub> O | Ni/ZnO                                         | 245                 | 60                       |        | 2     | >99            | 34.4            | [6]       |
| Glucose       | H <sub>2</sub> O | CuCrCa                                         | 140                 | 60                       |        | 2     | >99            | 53              | [7]       |
| Lactic acid   | H <sub>2</sub> O | Ru/C                                           | 120                 | 35                       |        | 2.5   | 23             | >99             | [8]       |
| Lactic acid   | H <sub>2</sub> O | Cu/SiO <sub>2</sub>                            | 200                 | 7.5                      |        | -     | >99            | 88              | [9]       |
| Ethyl lactate | Heptane          | Ru-B/Al <sub>2</sub> O <sub>3</sub>            | 150                 | 55                       |        | 10    | 91             | 92              | [10]      |
| Ethyl lactate | Heptane          | CoB                                            | 160                 | 60                       |        | 9     | 98             | >99             | [11]      |
| Ethyl lactate | H <sub>2</sub> O | Ru/SiO <sub>2</sub>                            | 160                 | 50                       |        | 8     | 83             | 92              | [12]      |
| Lactide       | MeOH             | Cu/Cr/Ba                                       | 150                 | 150                      |        | 15    | >99            | >99             | [13]      |
| Lactide       | THF              | Ru(II) PNN                                     | 110                 | 10                       |        | 48    | >99            | 87              | [14]      |
| PLA           | MeOH             | Cu/Cr/Ba                                       | 150                 | 150                      |        | 15    | >99            | 88              | [13]      |
| PLA           | Toluene          | Zn(OAc) <sub>2</sub> ·2H <sub>2</sub> O        | 110                 | (EtO) <sub>2</sub> MeSiH |        | 48    | 71             | 92              | [15]      |
| PLA           | THF              | Ru-MACHO-BH                                    | 140                 | 45                       |        | 3     | >99            | >99             | [16]      |
| PLA           | 1,4-Dioxane      | Ru(triphos)tm <sub>m</sub> , HNTf <sub>2</sub> | 140                 | 100                      |        | 16    | >99            | >99             | [17]      |
| PLA           | Anisole/THF      | Ru(II) PNN                                     | 160                 | 54.4                     |        | 48    | >99            | -               | [18]      |

**Table S2.** Experimental design and observed response.

| Variables          | -1           |    |    | 0                            | 1         |
|--------------------|--------------|----|----|------------------------------|-----------|
| Time (h)           | 6            |    |    | 12                           | 18        |
| Temperature (°C)   | 160          |    |    | 180                          | 200       |
| Ethanol/PLA (mL/g) | 10           |    |    | 20                           | 30        |
| Run                | Coded levels |    |    | Yield of 1,2-propanediol (%) |           |
|                    | A            | B  | C  | Experimental (mean ± SD)     | Predicted |
| 1                  | -1           | 0  | 1  | 60.5 ± 2.3                   | 59.2      |
| 2                  | 0            | -1 | 1  | 38.2 ± 1.8                   | 39.2      |
| 3                  | -1           | 0  | -1 | 50.5 ± 0.7                   | 52.7      |
| 4                  | 0            | 0  | 0  | 70.5 ± 4.1                   | 69.3      |
| 5                  | 0            | 1  | 1  | 63.6 ± 3.0                   | 66.2      |

---

|    |    |    |    |                |      |
|----|----|----|----|----------------|------|
| 6  | 1  | 0  | 1  | $75.8 \pm 4.5$ | 73.6 |
| 7  | 1  | 1  | 0  | $66.9 \pm 3.5$ | 66.5 |
| 8  | 0  | 0  | 0  | $68.2 \pm 2.1$ | 69.3 |
| 9  | 0  | 0  | 0  | $72.2 \pm 5.1$ | 69.3 |
| 10 | 0  | 0  | 0  | $68.5 \pm 3.3$ | 69.3 |
| 11 | 0  | 0  | 0  | $67.0 \pm 4.7$ | 69.3 |
| 12 | 0  | 1  | -1 | $56.9 \pm 3.4$ | 55.9 |
| 13 | -1 | -1 | 0  | $28.5 \pm 1.8$ | 28.8 |
| 14 | 1  | 0  | -1 | $57.4 \pm 5.6$ | 58.7 |
| 15 | -1 | 1  | 0  | $56.3 \pm 1.1$ | 55.1 |
| 16 | 0  | -1 | -1 | $30.7 \pm 2.2$ | 28.1 |
| 17 | 1  | -1 | 0  | $36.6 \pm 2.9$ | 37.9 |

---

| Source         | Sum of Squares | df | F value | p-value  |                 |
|----------------|----------------|----|---------|----------|-----------------|
| Model          | 3549.8         | 9  | 56.7    | < 0.0001 | significant     |
| A              | 209.4          | 1  | 30.2    | 0.0009   |                 |
| B              | 1503.9         | 1  | 216.3   | < 0.0001 |                 |
| C              | 228.9          | 1  | 32.9    | 0.0007   |                 |
| AB             | 1.39           | 1  | 0.2     | 0.7      |                 |
| AC             | 17.77          | 1  | 2.6     | 0.2      |                 |
| BC             | 0.15           | 1  | 0.02    | 0.9      |                 |
| A <sup>2</sup> | 76.2           | 1  | 11.0    | 0.01     |                 |
| B <sup>2</sup> | 1359.4         | 1  | 195.5   | < 0.0001 |                 |
| C <sup>2</sup> | 66.3           | 1  | 9.5     | 0.02     |                 |
| Residual       | 48.7           | 7  |         |          |                 |
| Lack of fit    | 32.1           | 3  | 2.6     | 0.2      | not significant |
| Pure Error     | 16.6           | 4  |         |          |                 |
| Cor Total      | 3598.5         | 16 |         |          |                 |

R<sup>2</sup> = 0.99, Adj R<sup>2</sup> = 0.97, Pred. R<sup>2</sup> = 0.85, Adeq Precision = 22.52, C.V.% = 4.63

**Table S3.** ANOVA results of the quadratic model.



## Reference

- Pandhare, N.; Pudi, S.M.; Mondal, S.; Pareta, K.; Kumar, M.; Biswas, P. Development of Kinetic Model for Hydrogenolysis of Glycerol over Cu/MgO Catalyst in a Slurry Reactor. *Ind. Eng. Chem. Res.* **2017**, *57*, 101–110, <https://doi.org/10.1021/acs.iecr.7b03684>.
- Kim, N.D.; Park, J.R.; Park, D.S.; Kwak, B.K.; Yi, J. Promoter effect of Pd in CuCr<sub>2</sub>O<sub>4</sub> catalysts on the hydrogenolysis of glycerol to 1,2-propanediol. *Green Chem.* **2012**, *14*, 2638–2646, <https://doi.org/10.1039/c2gc00009a>.
- Xia, S.; Yuan, Z.; Wang, L.; Chen, P.; Hou, Z. Catalytic production of 1,2-propanediol from glycerol in bio-ethanol solvent. *Bioresour. Technol.* **2012**, *104*, 814–817, <https://doi.org/10.1016/j.biortech.2011.11.031>.
- Yuan, Z.; Wang, L.; Wang, J.; Xia, S.; Chen, P.; Hou, Z.; Zheng, X. Hydrogenolysis of glycerol over homogenously dispersed copper on solid base catalysts. *Appl. Catal. B: Environ.* **2011**, *101*, 431–440, <https://doi.org/10.1016/j.apcatb.2010.10.013>.
- Ardila, A.N.; Sánchez-Castillo, M.A.; Zepeda, T.A.; Villa, A.L.; Fuentes, G.A. Glycerol hydrodeoxygenation to 1,2-propanediol catalyzed by CuPd/TiO<sub>2</sub>-Na. *Appl. Catal. B: Environ.* **2017**, *219*, 658–671, <https://doi.org/10.1016/j.apcatb.2017.08.006>.
- Wang, X.; Meng, L.; Wu, F.; Jiang, Y.; Wang, L.; Mu, X. Efficient conversion of microcrystalline cellulose to 1,2-alkanediols over supported Ni catalysts. *Green Chem.* **2012**, *14*, 758–765, <https://doi.org/10.1039/c2gc15946e>.
- Xiao, Z.; Jin, S.; Sha, G.; Williams, C.T.; Liang, C. Two-Step Conversion of Biomass-Derived Glucose with High Concentration over Cu–Cr Catalysts. *Ind. Eng. Chem. Res.* **2014**, *53*, 8735–8743, <https://doi.org/10.1021/ie5012189>.
- Iqbal, S.; Kondrat, S.A.; Jones, D.R.; Schoenmakers, D.C.; Edwards, J.K.; Lu, L.; Yeo, B.R.; Wells, P.P.; Gibson, E.K.; Morgan, D.J.; et al. Ruthenium Nanoparticles Supported on Carbon: An Active Catalyst for the Hydrogenation of Lactic Acid to 1,2-Propanediol. *ACS Catal.* **2015**, *5*, 5047–5059, <https://doi.org/10.1021/acscatal.5b00625>.
- Cortright, R.; Sanchez-Castillo, M.; Dumesic, J. Conversion of biomass to 1,2-propanediol by selective catalytic hydrogenation of lactic acid over silica-supported copper. *Appl. Catal. B: Environ.* **2002**, *39*, 353–359, [https://doi.org/10.1016/s0926-3373\(02\)00121-2](https://doi.org/10.1016/s0926-3373(02)00121-2).
- Luo, G.; Yan, S.; Qiao, M.; Zhuang, J.; Fan, K. Effect of tin on Ru-B/γ-Al<sub>2</sub>O<sub>3</sub> catalyst for the hydrogenation of ethyl lactate to 1,2-propanediol. *Appl. Catal. A: Gen.* **2004**, *275*, 95–102.
- Ma, X.; Sun, D.; Zhao, F.; Du, C. Liquid phase hydrogenation of biomass-derived ethyl lactate to propane-1,2-diol over a highly active CoB amorphous catalyst. *Catal. Commun.* **2015**, *60*, 124–128, <https://doi.org/10.1016/j.catcom.2014.11.027>.
- Feng, J.; Xiong, W.; Jia, Y.; Wang, J.; Liu, D.; Qin, R. Hydrogenation of ethyl lactate over ruthenium catalysts in an additive-free catalytic system. *React. Kinet. Catal. Lett.* **2011**, *104*, 89–97, <https://doi.org/10.1007/s11144-011-0329-9>.
- Shuklov, I.A.; Dubrovina, N.V.; Schulze, J.; Tietz, W.; Kühlein, K.; Börner, A. Propane-1,2-diols from Dilactides, Oligolactides, or Poly-L-lactic Acid (PLLA): From Plastic Waste to Chiral Bulk Chemicals. *Chem. – A Eur. J.* **2014**, *20*, 957–960, <https://doi.org/10.1002/chem.201302004>.
- Balaraman, E.; Fogler, E.; Milstein, D. Efficient hydrogenation of biomass-derived cyclic di-esters to 1,2-diols. *Chem. Commun.* **2011**, *48*, 1111–1113, <https://doi.org/10.1039/c1cc15778g>.
- Fernandes, A.C. Reductive depolymerization of plastic waste catalyzed by Zn(OAc)<sub>2</sub>·2H<sub>2</sub>O. *ChemSusChem*, **2021**, *14*, 4228–4233.
- Kindler, T.O.; Alberti, C.; Fedorenko, E.; Santangelo, N.; Enthaler, S. Ruthenium-catalyzed hydrogenative degradation of end-of-life poly(lactide) to produce 1,2-propanediol as platform chemical. *ChemistryOpen* **2020**, *9*, 401–404.
- Westhues, S.; Idel, J.; Klankermayer, J. Molecular catalyst systems as key enablers for tailored polyesters and polycarbonate recycling concepts. *Sci. Adv.* **2018**, *4*, eaat9669, <https://doi.org/10.1126/sciadv.aat9669>.
- Krall, E.M.; Klein, T.W.; Andersen, R.J.; Nett, A.J.; Glasgow, R.W.; Reader, D.S.; Dauphinais, B.C.; Mc Ilrath, S.P.; Fischer, A.A.; Carney, M.J.; et al. Controlled hydrogenative depolymerization of polyesters and polycarbonates catalyzed by ruthenium(ii) PNN pincer complexes. *Chem. Commun.* **2014**, *50*, 4884–4887, <https://doi.org/10.1039/c4cc00541d>.
